# Supplementary figures and images for: The functional O-mannose glycan on α-dystroglycan contains a phospho-ribitol primed for matriglycan addition
Source: eLife journal article supplement (doi:10.7554/elife.14473), 2016-04-29

## MS

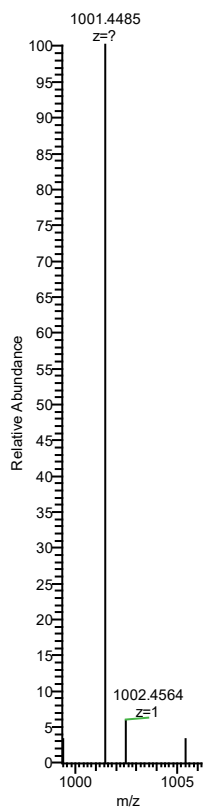

## MS/MS

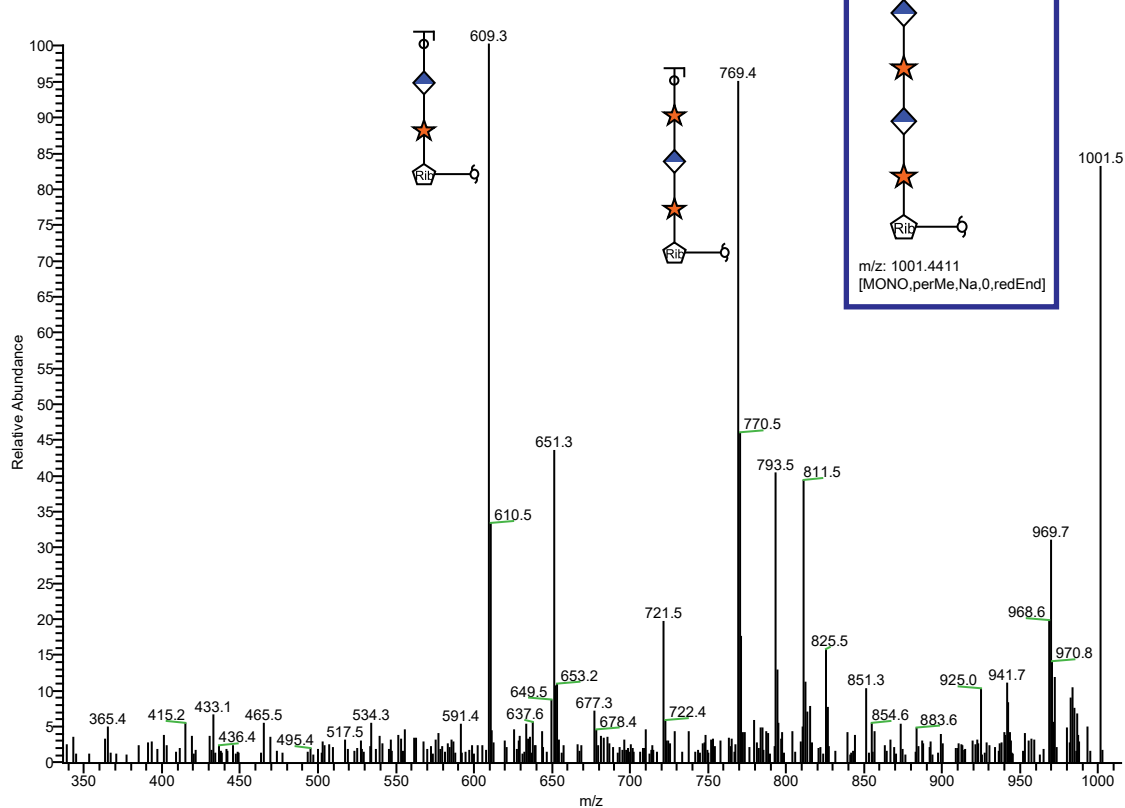

Supplement: supp [file elife_poa_e14473_Figure_2_figure_supplement_1.pdf › elife_poa_e14473_Figure_2_figure_supplement_1.pdf]

F2S2

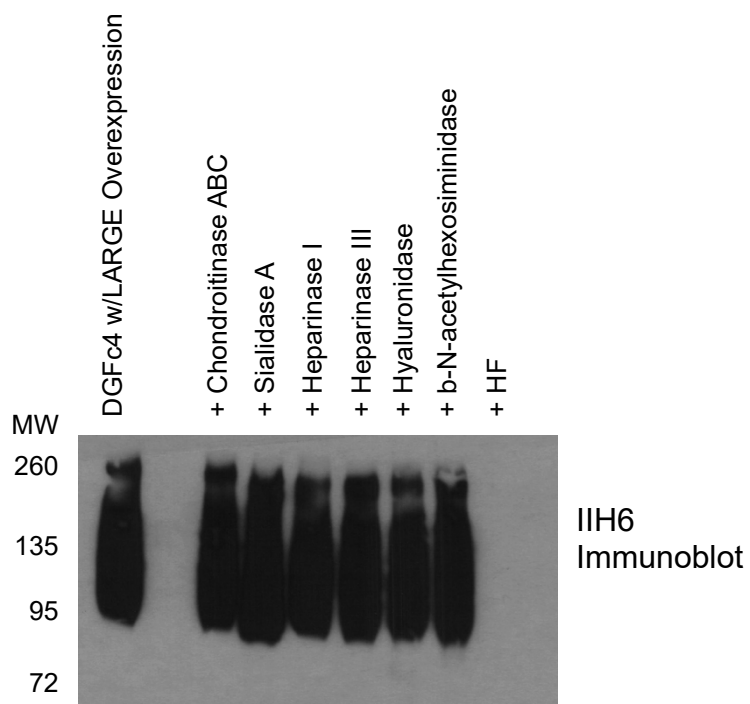

Supplement: supp [file elife_poa_e14473_Figure_2_figure_supplement_2.pdf › elife_poa_e14473_Figure_2_figure_supplement_2.pdf]

F3S1

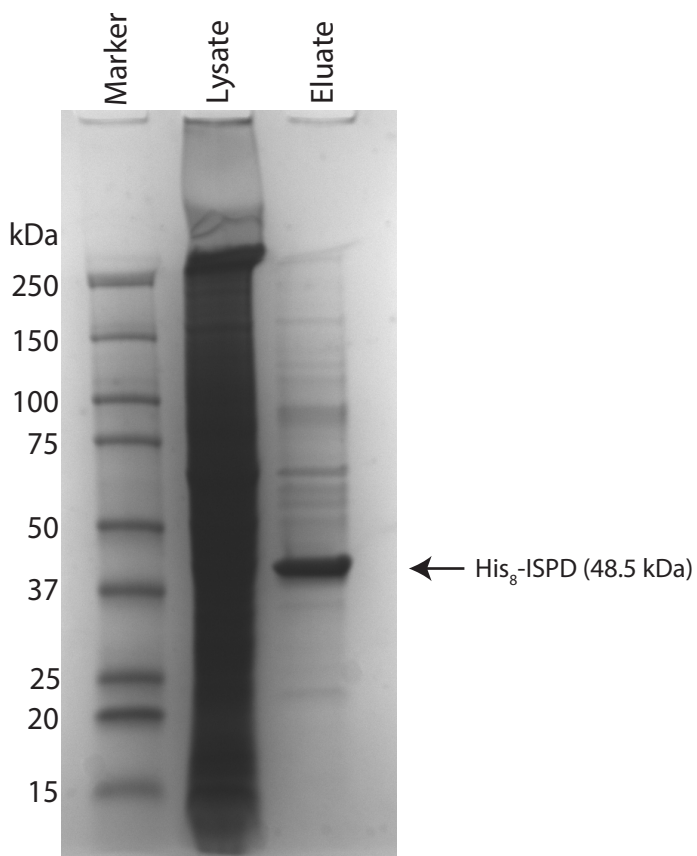

Supplement: supp [file elife_poa_e14473_Figure_3_figure_supplement_1.pdf › elife_poa_e14473_Figure_3_figure_supplement_1.pdf]

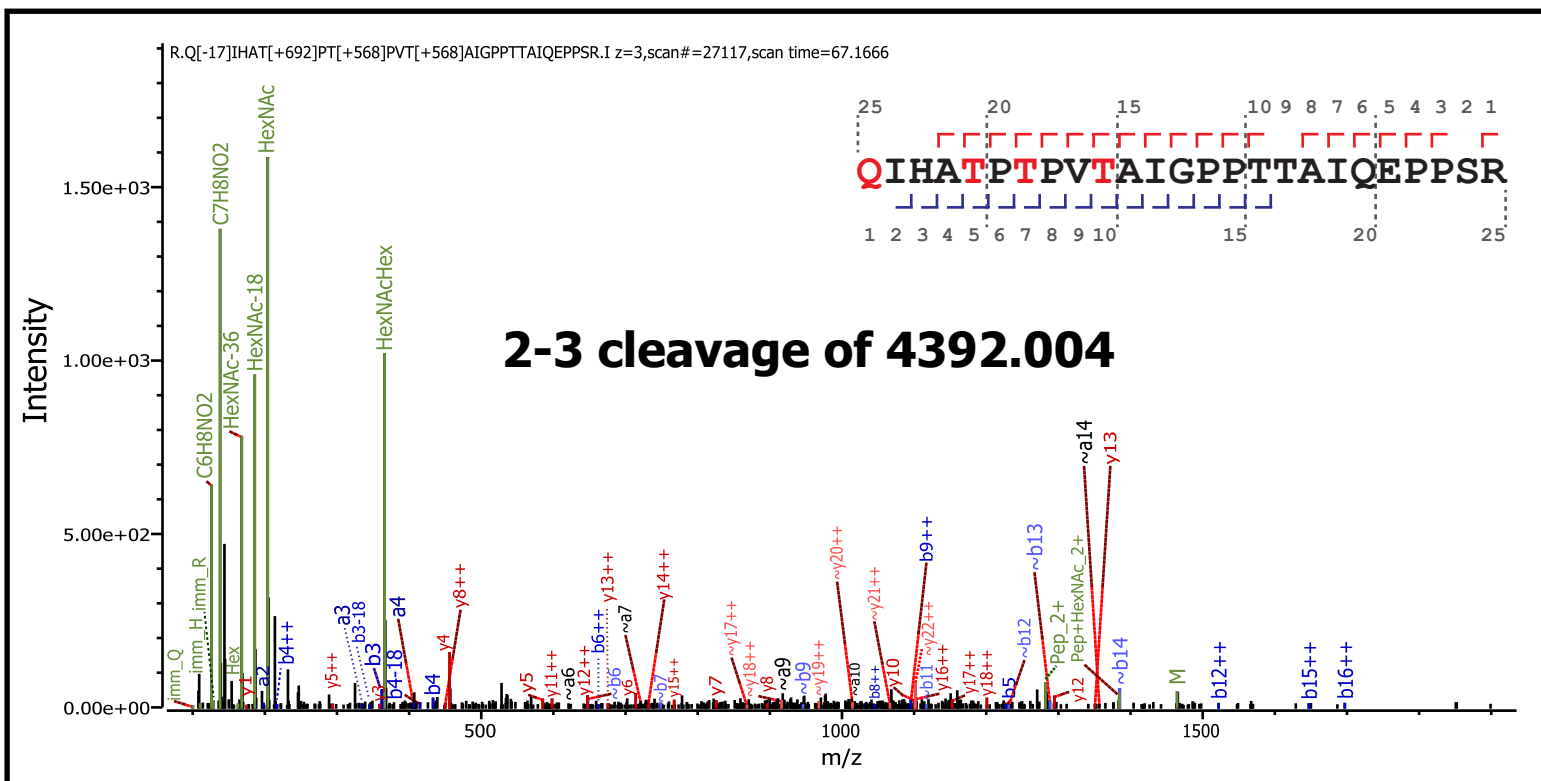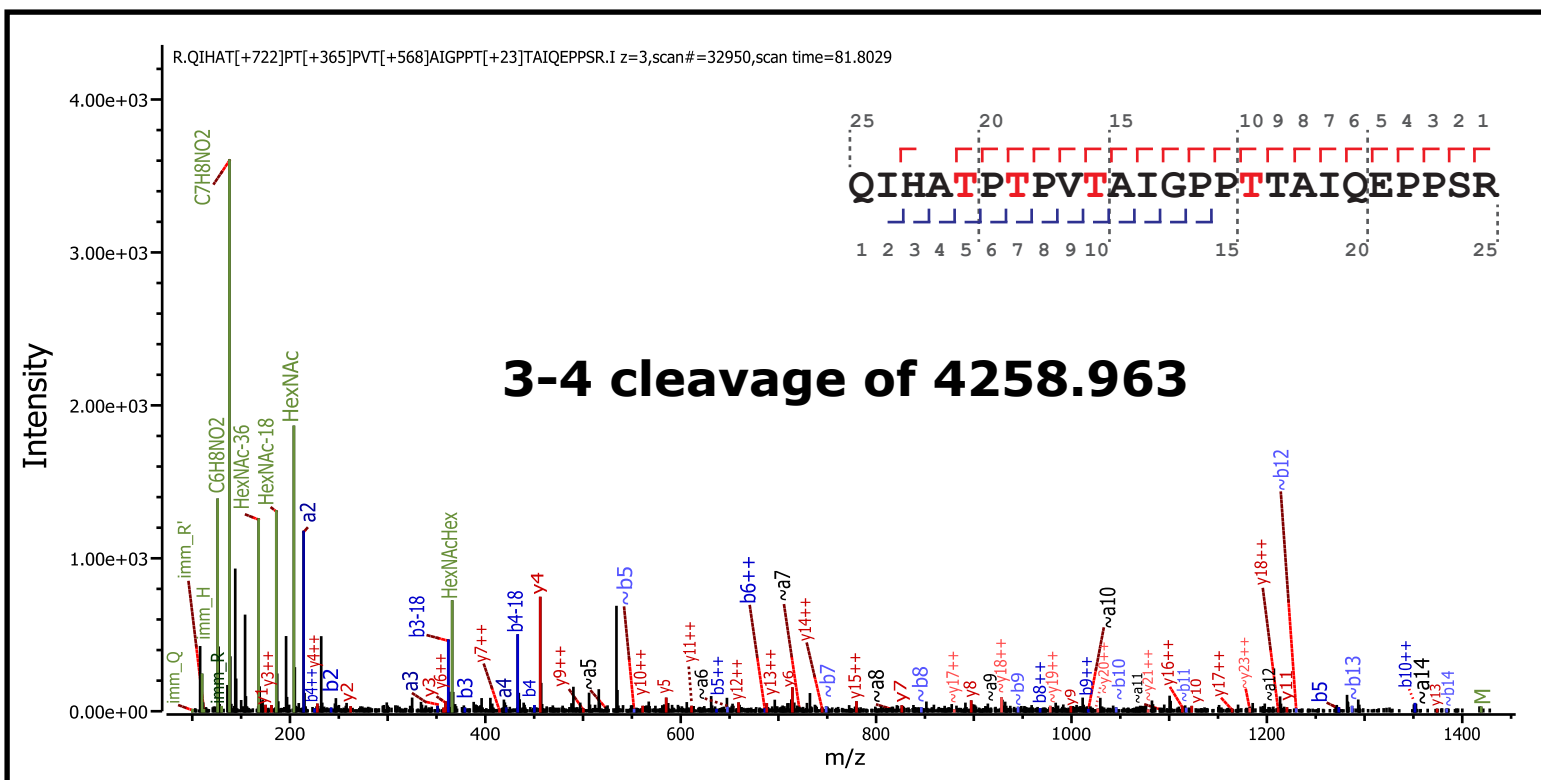

Supplement: supp [file elife_poa_e14473_Figure_4_figure_supplement_1.pdf › elife_poa_e14473_Figure_4_figure_supplement_1.pdf]

F4S2

Protein Amount (μg):

3

0.3

NaIO<sub>4</sub> Treated

IIH6 Dot Blot

Mock Treated

Untreated

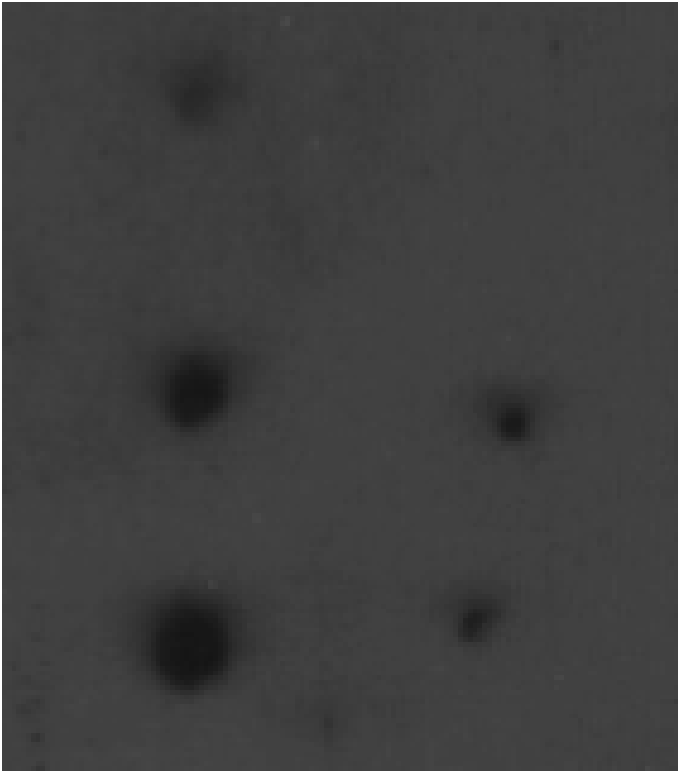

Supplement: supp [file elife_poa_e14473_Figure_4_figure_supplement_2.pdf › elife_poa_e14473_Figure_4_figure_supplement_2.pdf]

**A**

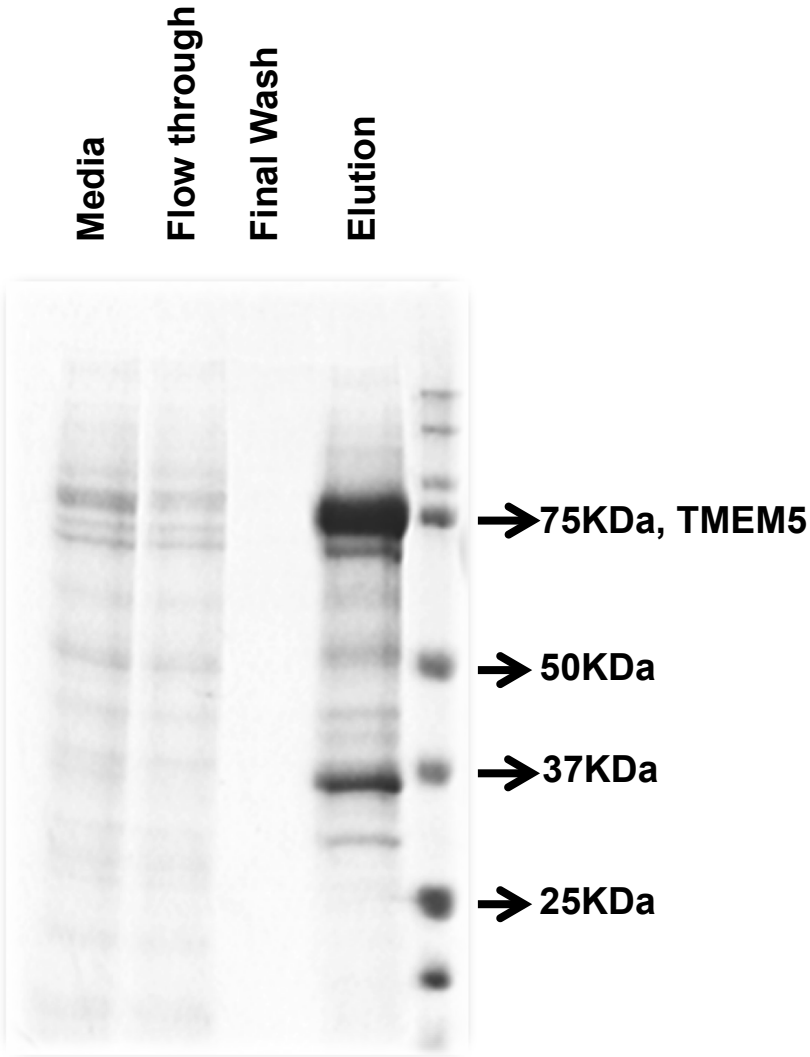

**B**

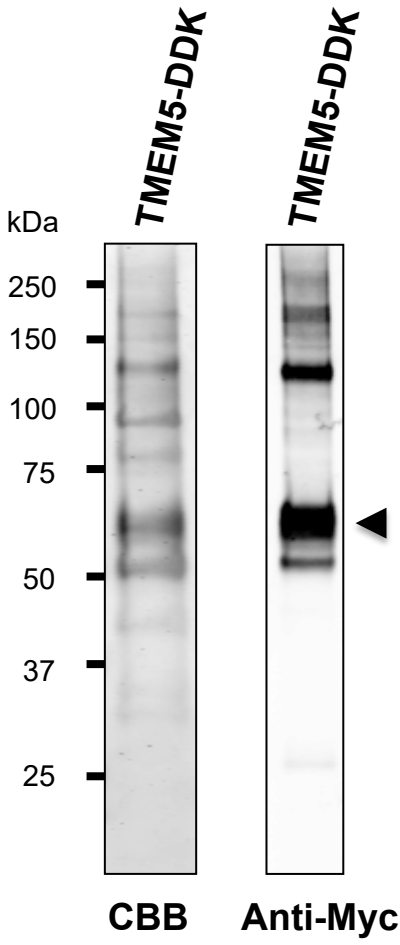

Supplement: supp [file elife_poa_e14473_Figure_5_figure_supplement_1.pdf › elife_poa_e14473_Figure_5_figure_supplement_1.pdf]

F5S2

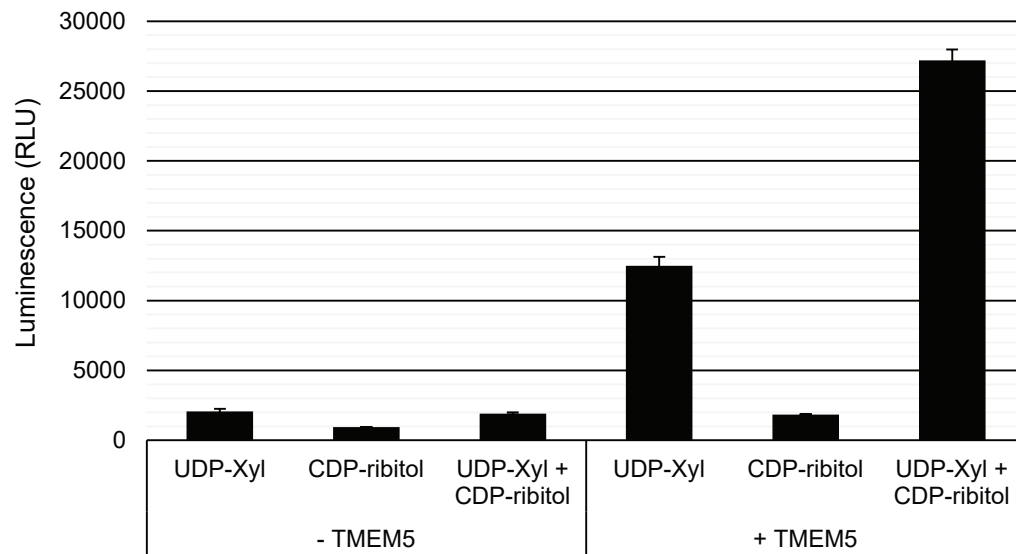

Supplement: supp [file elife_poa_e14473_Figure_5_figure_supplement_2.pdf › elife_poa_e14473_Figure_5_figure_supplement_2.pdf]

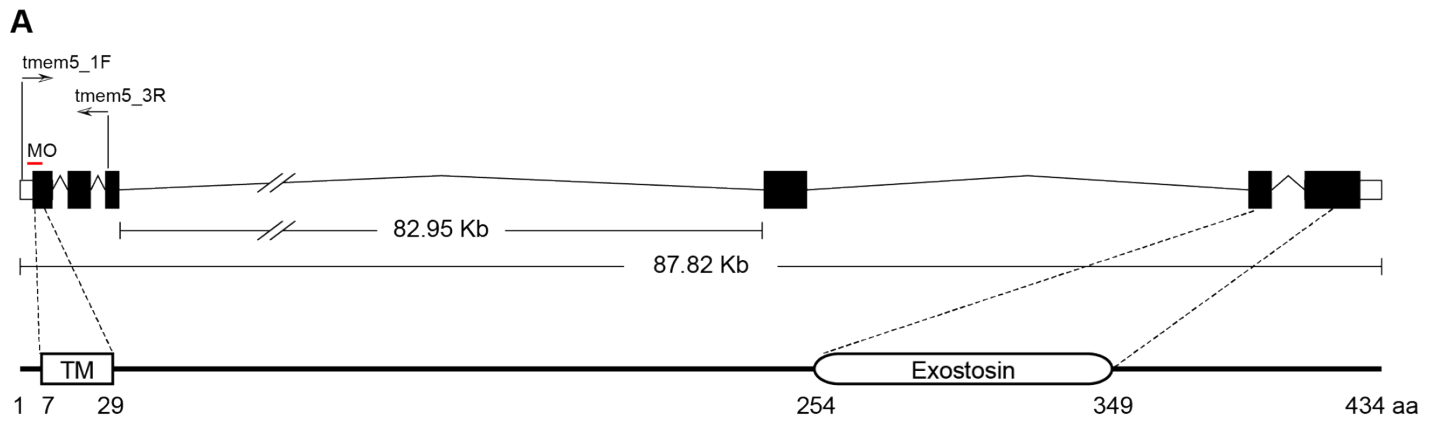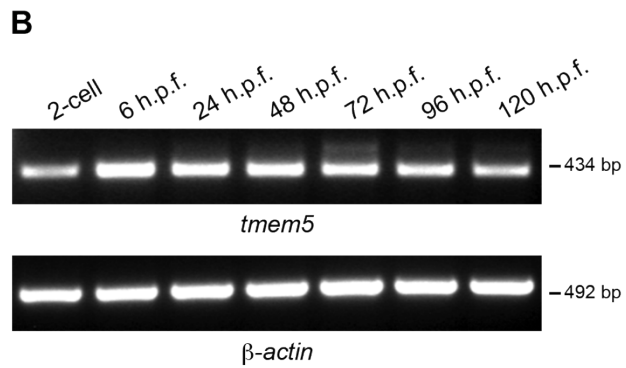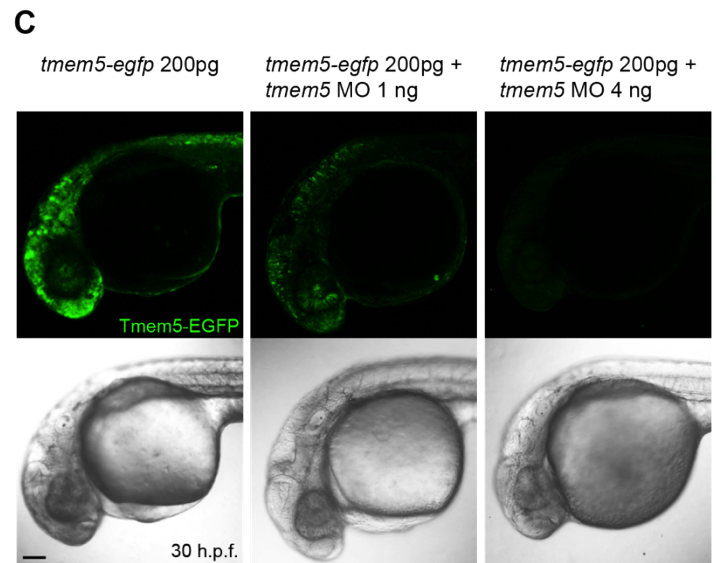

Supplement: supp [file elife_poa_e14473_Figure_6_figure_supplement_1.pdf › elife_poa_e14473_Figure_6_figure_supplement_1.pdf]

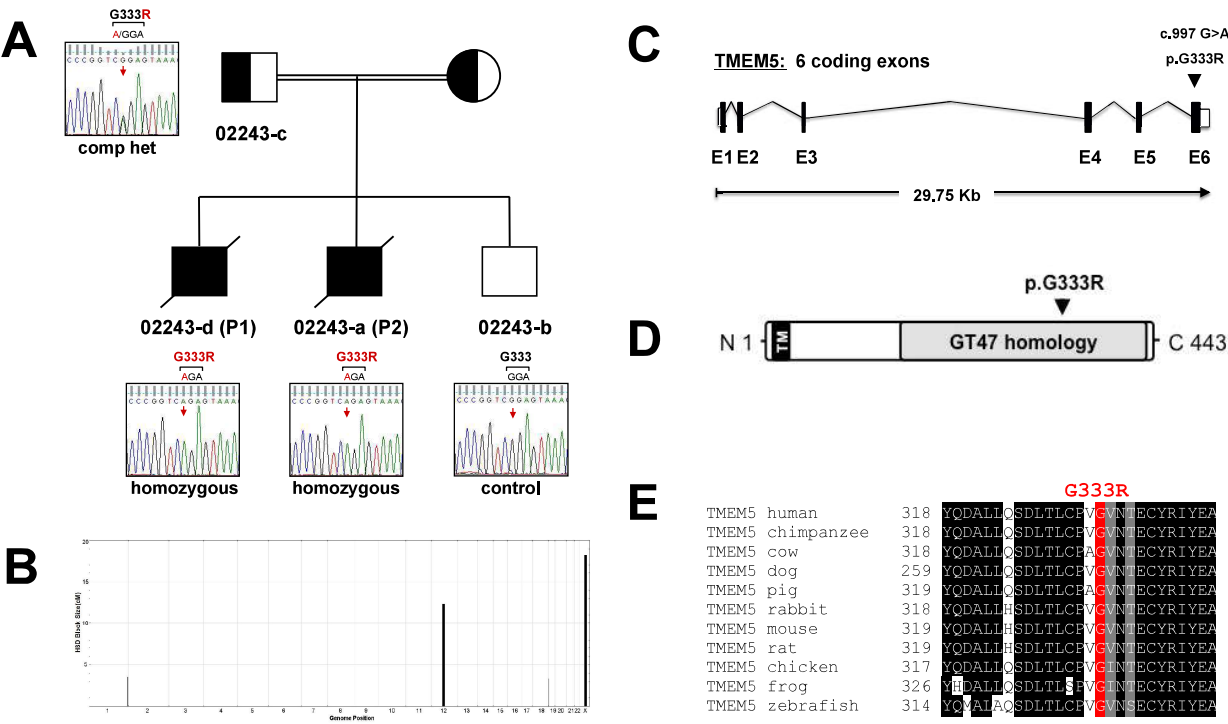

Supplement: supp [file elife_poa_e14473_Figure_7_figure_supplement_1.pdf › elife_poa_e14473_Figure_7_figure_supplement_1.pdf]

**A**

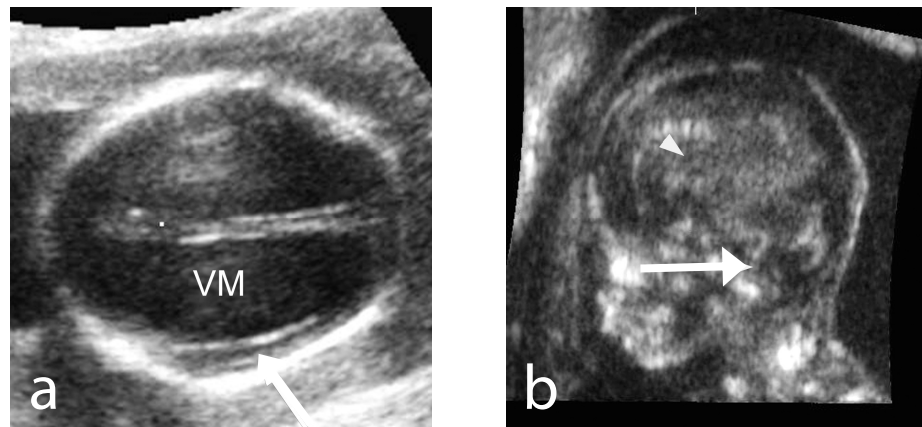

**B**

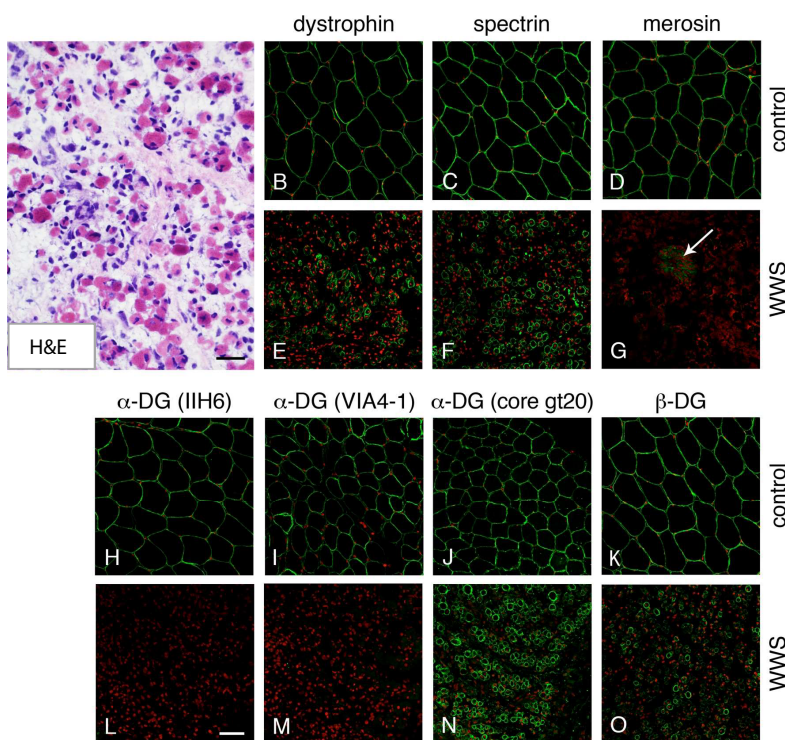

**C**

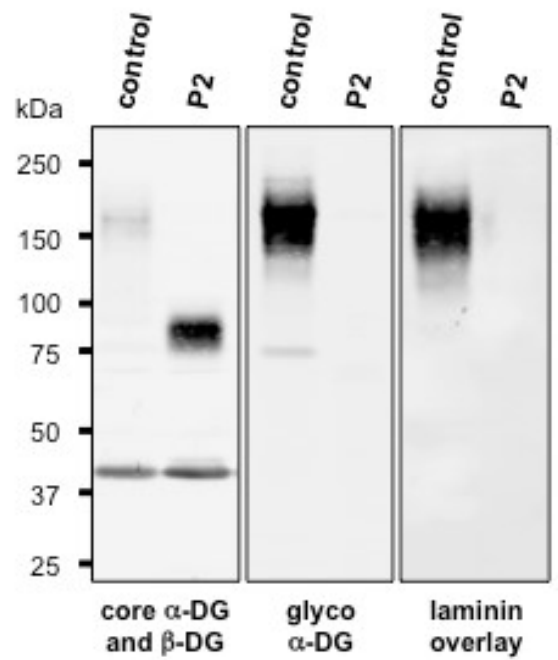

Supplement: supp [file elife_poa_e14473_Figure_7_figure_supplement_2.pdf › elife_poa_e14473_Figure_7_figure_supplement_2.pdf]
